# Supplementary material for: Mesoporous carbon nanoparticles capped with polyacrylic acid as drug carrier for bi-trigger continuous drug release
Source: Royal Society of Chemistry journal article supplement (doi:10.1039/c6tb00987e), 2016-01-01
Supplement: c6tb00987e1.pdf [file c6tb00987e1.pdf]

## **Mesoporous Carbon Nanoparticles with Polyacrylic Acid Capping as Drug Carrier for Bi-trigger Drug Continuous Release**

Yang Zhang<sup>a</sup>, Lu Han<sup>a</sup>, Lin-Lin Hu<sup>a</sup>, Yan-Qin Chang<sup>a</sup>, Rong-Huan He<sup>a\*</sup>, Ming-Li Chen<sup>a</sup>, Yang  
Shu<sup>b</sup>, Jian-Hua Wang<sup>a\*</sup>

<sup>a</sup>*Research Center for Analytical Sciences, College of Sciences, Northeastern University, Box  
332, Shenyang 110819, China*

<sup>b</sup>*Institute of Biotechnology, College of Life and Health Sciences, Northeastern University, Box  
H006, Shenyang 110169, China*

## Electronic Supplementary Information

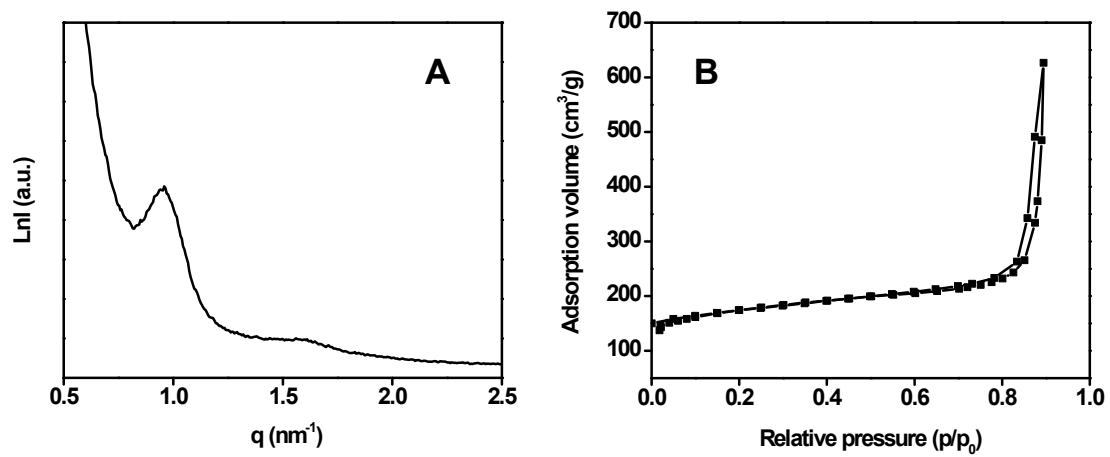

Fig. S1. (A) Small-angle X-ray scattering of the oxidized mesoporous carbon nanoparticles (ox-MCNs). (B) Nitrogen adsorption/desorption isotherms of ox-MCNs.

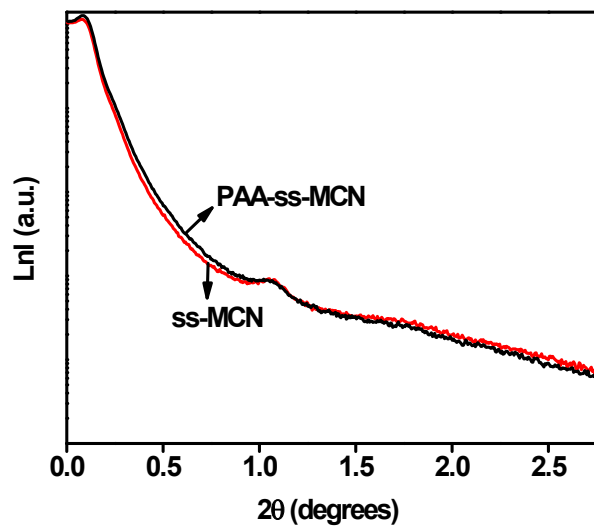

Fig. S2. Small-angle X-ray scattering of the ss-MCN and PAA-ss-MCN.

Table S1. The changes of binding energy area of ss-MCN and PAA-ss-MCN

| Name | Peak Binding Energy (eV) |            | Area (P) CPS. eV |            | At. %  |            |
|------|--------------------------|------------|------------------|------------|--------|------------|
|      | ss-MCN                   | PAA-ss-MCN | ss-MCN           | PAA-ss-MCN | ss-MCN | PAA-ss-MCN |
| C1s  | 284.6                    | 284.3      | 17658.5          | 12729.0    | 73.48  | 76.05      |
| N1s  | 400.7                    | 399.3      | 1379.3           | 501.7      | 3.23   | 1.68       |
| S2p  | 163.7                    | 163.5      | 1459.1           | 188.8      | 3.6    | 0.67       |
| O1s  | 532.8                    | 531.8      | 13462.5          | 10286.6    | 19.69  | 21.6       |

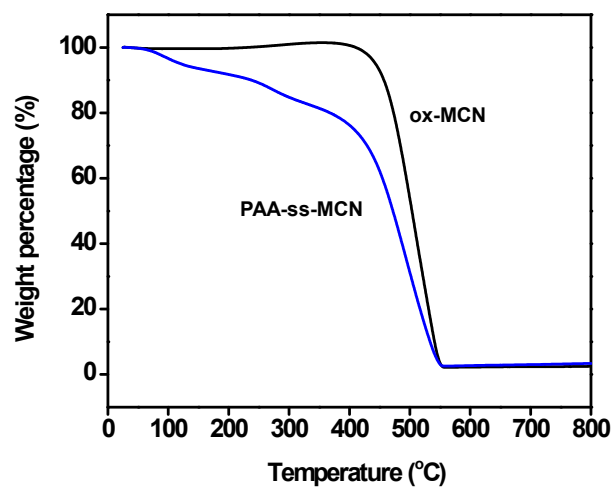

Fig. S3. TGA analysis results for primary ox-MCN and PAA-ss-MCN.

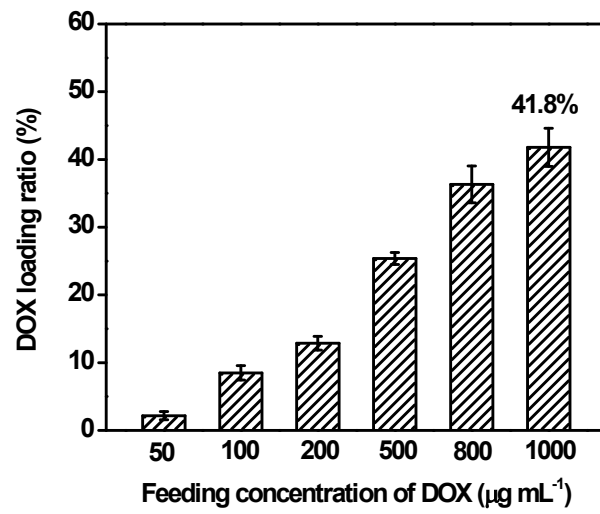

Fig. S4. Drug loading ratio in PBS buffer (10 mM, pH 7.4) with different primary concentrations of DOX; PAA-ss-MCN: 2 mg.

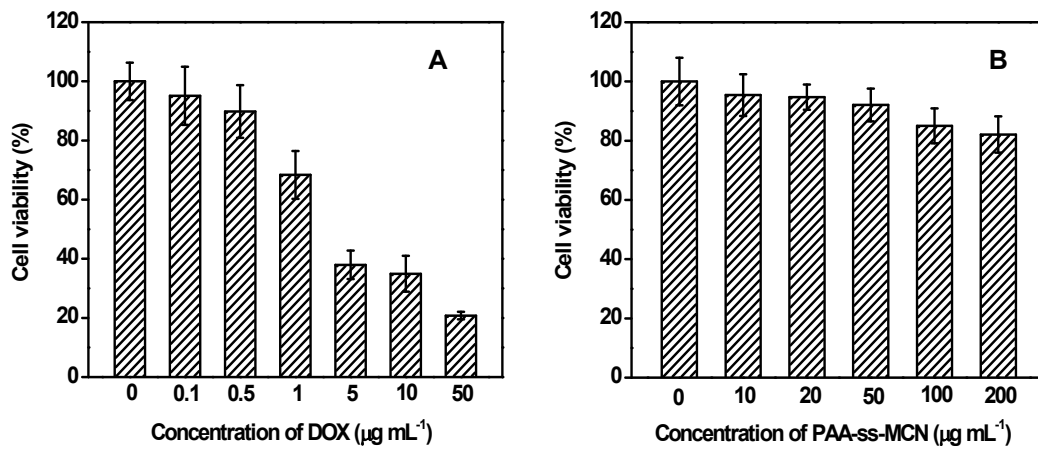

Fig. S5. Relative viability of HeLa cells incubating with different concentrations of DOX (A) and PAA-ss-MCN (B) for 24 h at 37°C, 5% CO<sub>2</sub>.

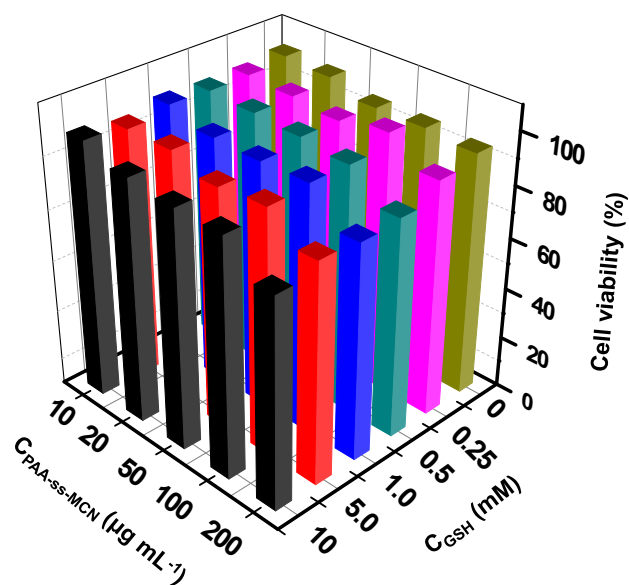

Fig. S6. Relative viability of HeLa cells incubating with various concentrations of PAA-ss-MCN in the presence of various concentrations of GSH for 24 h at 37°C, 5% CO<sub>2</sub>.



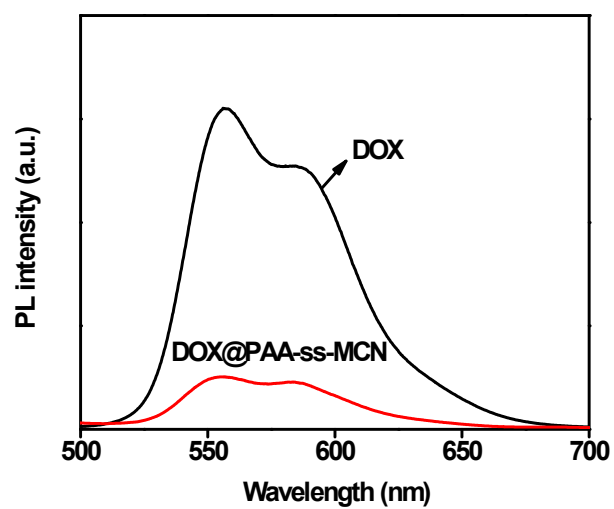

Fig. S7. (A) Fluorescence emission spectra of DOX and that of DOX@PAA-ss-MCN containing same amount of DOX. The fluorescence spectra are recorded at an excitation wavelength 470 nm.
